1     **Antibiograms and Molecular Characterization of Drug Resistance of**  
2     ***Mycobacterium abscessus* complex from Patients with Multidrug-Resistant**  
3     **Pulmonary Tuberculosis (MDR TB) Infection**

4

5     Kenneth A. Bongulto,<sup>a#</sup> Concepcion F. Ang<sup>b</sup>, Esperanza C. Cabrera<sup>a#</sup>

6

7     <sup>a</sup>Biology Department, College of Science, De La Salle University, Manila,

8     Philippines

9     <sup>b</sup>College of Medicine, University of the Philippines, Manila, Philippines

10

11     **Running Head:** Drug Resistance of *Mycobacterium abscessus* complex

12

13     #Address correspondence to Kenneth A. Bongulto, [kenneth\\_bongulto@dlsu.edu.ph](mailto:kenneth_bongulto@dlsu.edu.ph),

14     or Esperanza C. Cabrera, [esperanza.cabrera@dlsu.edu.ph](mailto:esperanza.cabrera@dlsu.edu.ph)

15     K.A.B. and E.C.C. contributed equally to this work.

16     **Keywords:** Antibiograms, Molecular characterization, *Mycobacterium abscessus*,  
17     *Mycobacterium massiliense*

17

18 **ABSTRACT**

19 In the Philippines, acid fast bacilli positive sputum samples commonly treated as  
20 TB due to *Mycobacterium tuberculosis* (MTB) complex. However, *Mycobacterium*  
21 *abscessus* (MAB) complex is often found in MTB cultures, or in patients confirmed  
22 negative for TB through sputum microscopy and culture. Hence, patients  
23 with MAB infections are mistakenly prescribed six-month anti-TB treatments. In this  
24 study, MAB complex isolates from MDRTB patients were identified and further  
25 sub-specified using the *mass* 3210 gene. Antimicrobial susceptibility was tested using  
26 broth microdilution and resistance genes *erm*(41), *rrs*, *rrl*, *gyrA*, and *gyrB* were  
27 studied for mutations. Majority were susceptible to amikacin, azithromycin,  
28 clarithromycin, and moxifloxacin [MAB: 100%, 100%, 100%, 81.8%, respectively; *M.*  
29 *massiliense* (MAM): 100%, 100%, 100%, 60%, respectively]. 50% MAM and 63.6%  
30 MAB were susceptible to cefoxitin; 60% MAM and 45.5% MAB were susceptible to  
31 ciprofloxacin; 72.7% MAB, and 10% MAM were susceptible to doxycycline. Inducible  
32 resistance to azithromycin and clarithromycin was found in 27.3% MAB and 30%  
33 MAM. 42.9% MAB complex isolates were MDR. Macrolide resistant MAB and  
34 MAM had T28 sequevar, showing functional *erm*(41) responsible for inducible  
35 resistance. Unexpectedly, full length *erm*(41) was found in MAM. The *rrl* gene in these  
36 isolates showed no point mutations, indicating T28 sequevar as cause of inducible  
37 resistance. All fluoroquinolone resistant isolates showed Ala-83 in *gyrA*  
38 fluoroquinolone resistant-dependent region (QRDR) and Arg-447 and Asn-464  
39 in *gyrB* QRDR. These are associated with resistance to the drug.

40

41     **INTRODUCTION**

42     In the Philippines, one of the most common rapidly growing mycobacteria (RGM) from  
43     patients with multiple drug resistant tuberculosis (MDR-TB) infection is *M. abscessus*  
44     complex. This non-tuberculous *Mycobacterium* (NTM) species is usually found in TB  
45     culture, either growing alongside with *M. tuberculosis* or after the patient has been  
46     confirmed negative for pulmonary tuberculosis through direct sputum smear  
47     microscopy (DSSM) and TB culture. Pulmonary diseases caused by the *M. abscessus*  
48     complex are extremely hard to manage for these species are found to be resistant to  
49     anti-tuberculous agents. Patients with *M. abscessus* infection do not receive appropriate  
50     treatment for they are considered to have chronic TB and MDR-TB. As a result,  
51     patients are prescribed a six-month anti-TB treatment which is not appropriate for *M.*  
52     *abscessus* infections. Interestingly, there is no known study in the Philippines regarding  
53     the antimicrobial resistance profile of *M. abscessus* complex. NTM studies are  
54     overshadowed by pulmonary TB research studies and therefore, clinicians are not  
55     guided on the treatment for NTM infections. Moreover, detection of NTM species  
56     is not part of the routine procedure in the clinical microbiology laboratory. Treatment  
57     failure to both first-line anti-TB drugs rifampicin and isoniazid is linked to infection  
58     with multidrug-resistant *M. tuberculosis* (MDR-TB). Gler *et al.* (2012) showed very  
59     high rates (83% to 97%) of MDR-TB infections in the Philippines in 2012. Because  
60     MDR TB is often associated with the occurrence of *M. abscessus* complex in clinical  
61     samples, the present study aimed to characterize local isolates of *M. abscessus* complex  
62     from patients with multidrug-resistant pulmonary tuberculosis in terms of their  
63     antimicrobial susceptibility profiles and determine the genetics of the antibiotic

64 resistance. More specifically, this study aimed to determine the phenotypic  
65 characteristics of *M. abscessus* complex using colony morphology, growth rate, and  
66 pigmentation; to determine subspecies of the *M. abscessus* complex isolates using  
67 amplification and sequencing of the *mass\_3210* gene; to assess susceptibility of *M.*  
68 *abscessus* complex to antimicrobials (clarithromycin CLR, azithromycin AZM,  
69 amikacin AMK, ciprofloxacin CIP, moxifloxacin MXF, ceftiofur FOX, and  
70 doxycycline DOX) commonly used against it; and to determine the mechanism of  
71 antibiotic resistance by conducting sequence analysis of the drug resistance related  
72 genes [*erm*(41), *rhl*, *rrs*, *gyrA*, and *gyrB*] in selected isolates.

73

## 74 **MATERIALS AND METHODS**

### 75 **Study Site and Bioethical Clearance**

76 All procedures involving handling of infectious materials (culture, DNA extraction,  
77 NTM identification, and drug susceptibility tests) were conducted in the P3 laboratory  
78 of the National Center for Pulmonary Research, Lung Center of the Philippines. The  
79 study sought approval from the Institutional Ethics Review Board of the Lung Center  
80 of the Philippines. The requirement for informed consent was waived since the isolates  
81 from the stock cultures to be studied were anonymized, but bioethical clearances from  
82 the De La Salle University – Manila, and the Lung Center of the Philippines were  
83 procured.

84

### 85 **Study Isolates and Identification of *Mycobacterium abscessus***

86 The sample size computation for an interval estimate of population

87 was used to determine the required sample size of *M. abscessus* complex isolates for  
the study. This is as follows:  $n = t^2 \times p(1-p) / m^2$ , where  
88  $n$  is the required sample size,  $t$  is the confidence level at 95% (standard value of 1.96),  
89  $p$  is the estimated prevalence of NTM, and  $m$  is the relative precision (Charan &  
90 Biswas, 2013). The prevalence rate used for the sample size computation was from the  
91 report of Siapno *et al.* (2016) on a retrospective study of 6,886 specimens from NTM  
92 infection in a tertiary hospital in the Philippines, which was 2.28%. The relative  
93 precision used was one-fifth of the prevalence which was 0.00456. Since the prevalence  
94 rate was small, the precision of 5% seemed to be inappropriate. A conservative choice  
95 would be one-fourth or one-fifth of prevalence as the amount of precision in the case  
96 of small prevalence (Pourhoseingholi *et al.*, 2013). The computed sample size of 20  
97 was based on NTM, and the study adapted this as 20 *M. abscessus* complex. One  
hundred seventeen (117) NTM clinical isolates collected from patients with  
98 multiple drug-resistant TB infections and were confirmed MPT64 antigen negative  
99 were obtained from the Programmatic Management of Drug Resistant Tuberculosis  
100 (PMDT) TB culture located at the National Center for Pulmonary Research, Lung  
101 Center of the Philippines from which these 20 isolates identified to be *M. abscessus*  
complex were taken.

102

### 103 **Phenotypic characterization of *Mycobacterium abscessus* complex**

104 Freshly grown 5 to 7-day old cultures of *M. abscessus* complex were subjected to  
105 phenotypic characterization. Colony morphology was determined by observing the  
106 colonies grown on Ogawa medium. There are two possible morphotypes of *M.*

107 *abscessus* complex, namely: the smooth and rough colonies. Growth rate was also  
108 determined by checking the presence of visible colonies on Ogawa media on a daily  
109 basis. Pigmentation was determined by observing the color of the colonies on the  
110 Ogawa medium. *Mycobacterium abscessus* complex is comprised of non-  
111 photochromogens. All isolates were tested using the Ziehl Neelsen method to confirm  
112 the presence of acid fast bacilli (AFB) and to check the purity of the culture. More so,  
113 Kudoh method was conducted in cultures with contaminants. This involved adding 5%  
114 NaOH to the culture of *M. abscessus* complex grown in 7H9 broth in a ratio of 1:1 (v/v)  
115 The processed isolates were re-incubated at 37°C for 5 to 7 days. AFB smear was  
116 conducted again, to check for purity and to confirm presence of acid-fast bacilli.

117

#### 118 **Identification of subspecies of *Mycobacterium abscessus* complex**

119 One hundred seventeen (117) NTM clinical isolates were screened for the identification  
120 of *M. abscessus* and *M. massiliense* isolates. All isolates were grown in Middlebrook  
121 7H9 broth enriched with albumin dextrose catalase (ADC). These were incubated at  
122 37°C for 5 to 7 days or until turbidity was observed and checked for purity. New stock  
123 cultures were prepared in Ogawa butt-slants to serve as working stocks, and in  
124 10% glycerol at -70°C.

125

126 For identification, DNA extraction was done on freshly grown  
127 5 to 7 day-old cultures using Bio-Rad Chelex resin (Al-Mutairi *et al.*, 2011) as follows:  
128 A loopful of mycobacterial isolate was suspended in a 200 µL solution containing 40mg  
129 Chelex100 and 100 mL of water. The resulting material was kept at 95°C for 20

130 minutes. It was centrifuged for 15 minutes at 12,000 x g. The supernatant was  
131 transferred to a sterile Eppendorf® tube and was used as the source of DNA for the  
132 one-step multiplex PCR assay. The one-step multiplex PCR assay designed by Chae *et*  
133 *al.* (2017) was used (1) to discriminate pan-mycobacterial from non-mycobacterial  
134 species by amplifying the 16S rRNA gene, (2) to distinguish between MTB complex  
135 and NTM species in mycobacteria by amplifying the *rv0577*, (3) to identify *M.*  
136 *tuberculosis* by amplifying the RD9, (4) to identify *M. tuberculosis* Beijing family by  
137 amplifying the *mtbk\_20680*, and (5) to identify the five major NTM species and  
138 subspecies by amplifying IS1311 (*M. avium*), DT1 (*M. intracellulare*), *mass\_3210* (*M.*  
139 *abscessus* and *M. massiliense*), *mkan\_rs12360* (*M. kansasii*).

140

141 The PCR mixture was comprised of 1) 2x Prime Taq Premix (Genet Bio., Ltd.  
142 Daejeon, South Korea) containing Prime *Taq* DNA polymerase 1 unit/10ul, 2X reaction  
143 buffer, 4mM MgCl<sub>2</sub>, enzyme stabilizer, sediment, loading dye (pH 9.0), and 0.5 mM  
144 of each dATP, dCTP, dGTP, and dTTP; 2) 10 pmole of each of the following forward  
145 and reverse primers of *rv0577F* (5'-GAG ATA CTC GAG TGG CGA A-3'), *rv0577R*  
146 (5'-CAA CGC GAC AAA CCA CCT AC-3'), *DT1F* (5'-AAG GTG AGC CCA GCT  
147 TTG AAC TCC A-3'), *DT1R* (5'-GCG CTT CAT TCG CGA TCA TCA GGT G-3'),  
148 *mtbk\_20680F* (5'-TTA TGC CAG AAA TAC ACC CGC G-3'), *mtbk\_20680R* (5'-  
149 AAT CGC GGG CTT GTG GCT AC-3'), 16S rRNA<sub>F</sub> (5'-GAG ATA CTC GAG TGG  
150 CGA AC-3'), 16S rRNA<sub>R</sub> (5'-CAA CGC GAC AAA CCA CCT AC-3'), RD9F (5'-  
151 GTG TAG GTC AGC CCC ATC C-3'), RD9R (5'-GTA AGC GCG TGG TGT GGA-  
152 3'), IS1311F (5'-TCG ATC AGT GCT TGT TCG CG-3'), IS1311R (5'-CGA TGG

153 TGT CGA GTT GCT CT-3'), *mass\_3210F* (5'-GCT TGT TCC CGG TGC CAC AC-  
154 3'), *mass\_3210R* (5'-GGA GCG CGA TGC GTC AGG AC-3'), *mkan\_rs12360F* (5'-  
155 ACA AAC GGT GTG TCG CAA TGT GCC A-3'), and *mkan\_rs12360R* (5'-TGT  
156 CGA GCA GAC GTT CCA GGA CGG T-3'), respectively; 3) 2  $\mu$ l DNA template;  
157 and 4) sterile deionized distilled water. The cycling condition included an initial  
158 denaturation step at 95°C for 10 minutes, then 30 cycles at 96°C for 45 seconds, 61.5°C  
159 for 45 seconds, and 72°C for 40 seconds, followed by 72°C for 10 minutes for the final  
160 extension. The amplicons were analyzed using 2% gel for 40 minutes at 100 V in 0.5X  
161 TBE buffer. The gels were visualized using the Bio-Rad ImageLab gel reader (Bio-Rad  
162 Laboratories Inc. USA).

163

#### 164 **Antimicrobial Susceptibility Testing**

165 The mycobacterial isolates were cultured on Ogawa medium at 37°C for 5 to 7 days.  
166 Suspensions were prepared by aseptically sweeping the confluent portion of growth on  
167 the Ogawa medium with a sterile loop. Growth on the sterile loop was transferred to  
168 4.5 mL of sterile water containing glass beads (7 to 10 3-mm beads) until the turbidity  
169 matched the 0.5 McFarland standard with an approximate organism density of  $1 \times 10^5$   
170 colony forming units  $\text{ml}^{-1}$  (CFU/mL). The final inoculum with  $5 \times 10^2$  CFU/mL was  
171 prepared by transferring 50  $\mu$ l of the suspension to a tube containing 10 ml of cation  
172 adjusted Mueller-Hinton broth (CLSI M24-A2, 2011).

173

174 Antimicrobial susceptibility testing of *M. abscessus* complex isolates was performed  
175 using the gold standard assay recommended by the Clinical Laboratory Standards



176 Institutes (CLSI M24-A2, 2011) which is the microdilution technique. BBL cation  
177 adjusted Mueller-Hinton (CAMH) Broth (BD, Franklin Lakes, NJ, USA) with 5%  
178 OADC was used as the medium for the tests. Tests on the mycobacterial strains were  
179 conducted in 96-well microplates. The broth microdilution method is traditionally set  
180 up as two-fold dilutions. The following working ranges were used for the mycobacteria:  
181 the concentration range for amikacin, cefoxitin, and azithromycin was 0.25 to 256  
182  $\mu\text{g}/\text{mL}$ ; the concentration range for clarithromycin, ciprofloxacin, doxycycline, and  
183 moxifloxacin was 0.0625 to 64  $\mu\text{g}/\text{mL}$  (CLSI M24-A2, 2011). All antimicrobial drugs  
184 used for the antimicrobial susceptibility test were procured from Sigma Aldrich  
185 (Merck Group, USA). To determine the amount of antimicrobial agent  
186 powder needed for a standard solution, the formula outlined in the CLSI M24-A2, 2011  
187 was used.

188

189 The thoroughly mixed antimicrobial dilutions (100  $\mu\text{l}$ ) were dispensed into each well,  
190 except for the 11<sup>th</sup> well, which is a drug-free well for bacterial growth control. The 1<sup>st</sup>  
191 well contained 200  $\mu\text{l}$  of CAMHB and served as the negative control. A total of 100  
192  $\mu\text{l}$  of the final inoculum was dispensed in the second well up to the 11<sup>th</sup> well. The final  
193 volume in each well was 200  $\mu\text{l}$ . Reference strain of antimicrobial susceptible *M.*

194 *peregrinum* ATCC<sup>®</sup> 700686 was tested along with the test clinical isolates to serve as  
195 the quality control. The inoculated 96-well microplate were sealed and incubated at  
196 37°C. The MIC values for amikacin, cefoxitin, doxycycline, ciprofloxacin,  
197 moxifloxacin, azithromycin and clarithromycin were read on the third day after the  
198 inoculum was added. The MICs of azithromycin and clarithromycin for isolates

199 showing susceptible results on the third day were read again on the 7<sup>th</sup> day and 14<sup>th</sup> day  
200 to determine the presence of inducible resistance to the macrolides (Nie *et al.*, 2014).  
201 Inducible resistance to macrolides was concluded once the mycobacterial strains  
202 showed azithromycin or clarithromycin susceptibility on the third day and resistance  
203 on the 7<sup>th</sup> or 14<sup>th</sup> day (Lee *et al.*, 2014). Thirty microliters of a freshly prepared 0.01%  
204 of 10X resazurin (Accumed International, Westlake, Ohio) reagent were added to all  
205 wells in the microplate. A blue color in the well was interpreted as no growth, while a  
206 pink color was scored as growth. The MIC was defined as the lowest drug concentration  
207 which prevented the color change from blue to pink (Franzblau *et al.*, 1998). Each test  
208 was done in triplicate.

209

#### 210 **PCR amplification of *rrl*, *erm*(41), *rrs*, *gyrA*, and *gyrB* genes**

211 Sequencing of *rrl* and *erm*(41) genes was conducted to compare and analyze the  
212 characteristics of the susceptible and resistant *M. abscessus* strains to AZM and CLR,  
213 respectively. The primer sets are as follows: *erm*(41)F (5'-GAG CGC CGT CAC AAG  
214 ATG CAC A-3'), *erm*(41)R (5'-GAC TTC CCC GCA CCG ATT CCA C-3'), *rrl*F (5'-  
215 GTA GCG AAA TTC CTT TGT CGG-3'), and *rrl*R (5'-TTC CCG CTT AGA TGC  
216 TTT CAG-3') (Nash *et al.*, 1995; Nash *et al.*, 2009). The primer sets for the  
217 amplification of the amikacin resistance-related gene are *rrs*F (5'-CAG TAC AGA  
218 GGG CTG CGA ACG-3') and *rrs*R (5'-AAG GAG GTG ATC CAG CCG CA-3')  
219 (Prammananan *et al.*, 1998). To characterize resistant *M. abscessus* strains to CIP and  
220 MXF, sequence analysis of the fluoroquinolone resistant-dependent region (QRDR) of  
221 the *gyrA* and *gyrB* genes was conducted. The primer sets are: *gyrA*F (5'-GGG CAT

222 CTA AAG CCG CTG AGA-3'), *gyrAR* (5'-GAC GAT GGC GCG CTG ACG T-3'),  
223 *gyrBF* (5'-GCA GAT GCT AAA ACG GTT GTG A-3') and *gyrBR* (5'-CTC GTA  
224 AGT ACG ACG GCA CAA-3') (Guillemin *et al.*, 1998).

225

## 226 **RESULTS and DISCUSSION**

227

### 228 **Phenotypic Characterization of *Mycobacterium abscessus* complex**

229 The *M. abscessus* complex isolates were characterized based on colony  
230 morphology, growth rate, and pigmentation. The isolates tended to aggregate and form  
231 biofilms on the third day of incubation in 7H9 broth medium incubated at 37°C.

232 Biofilms were visible both on the surface and at the bottom of the tubes. The enriched  
233 cultures of *M. abscessus* complex from 7H9 medium were grown in Ogawa butt slants  
234 to determine the proportion of smooth and rough colonies. Growth on the surface of  
235 the Ogawa medium was observed on the third day of incubation at 37°C.

236

237 The phenotypic characteristics of the 21 *M. abscessus* complex isolates are shown in  
238 Figures 1 and 2, and Table 1. Smooth colonies of *M. abscessus* and *M. massiliense*  
239 were moist, shiny, and round, while the rough colonies were dry, waxier, and wrinkled.  
240 The smooth colony of *M. abscessus* complex expresses glycopeptidolipid (GPL) on its  
241 cell wall and forms biofilms, while rough colony of *M. abscessus* complex does not  
242 form biofilms due to minimal amounts of GPL (Howard *et al.*, 2006; Byrd & Lyons,  
243 1999). Moreover, rough colony of *M. abscessus* is associated with virulence compared  
244 to the smooth colony of *M. abscessus*. In the present study, a total of 7 isolates (63.6%)

245 of *M. abscessus* and 3 (30.0%) *M. massiliense* isolates were characterized to have  
246 smooth colonies, while 4 (36.4%) *M. abscessus* and 7 (70.0%) *M. massiliense* isolates  
247 produced rough colonies. All *M. abscessus* and *M. massiliense* isolates were buff –  
248 colored and were categorized as nonphotochromogens, i.e., they were non-pigmented  
249 whether they were grown in the dark or in the presence of light. All (100%, 21/21)  
250 isolates that grew in Ogawa medium were acid fast. NTM appears as shorter rods  
251 compared to *M. tuberculosis* when viewed microscopically.

252

### 253 **Subspecies identification of *Mycobacterium abscessus* complex isolates**

254 The subspecies of the 117 clinical isolates that were found to be negative for MPT64  
255 were identified using multiplex PCR. Among the 117 clinical isolates, 11 (9.4%) were  
256 identified as *M. abscessus* and 10 (8.5%) were *M. massiliense* (Figure 4). The  
257 remaining isolates were identified as *M. tuberculosis* (15%, 17/114), other NTM  
258 species (53.8%, 63/117), and other microorganisms (14%, 16/114). It is also  
259 noteworthy that all 117 isolates were found negative using the MPT64 antigen kit, but  
260 some were identified as *M. tuberculosis* using the one-step multiplex PCR assay. These  
261 results may infer that mixed colonies of *M. tuberculosis* and NTM might be present in  
262 the stock cultures from the bank specimens. Purification was conducted on all identified  
263 *M. abscessus* complex isolates. Positive controls of *M. abscessus* and *M. massiliense*,  
264 which were clinical isolates from the bank specimens in the National Center for  
265 Pulmonary Research – TB laboratory that were previously identified by reverse blot  
266 hybridization assay were tested along with the *M. abscesus* complex test isolates.  
267

268 All mycobacteria showed the 506bp band corresponding to the 16S rRNA internal  
269 control which was specific only to all mycobacterial species. *M. abscessus* isolates  
270 showed the expected 310bp band and *M. massiliense* showed the 1145bp band using  
271 the primers for *mass\_3210*. The *mass\_3210* is a specific gene previously identified  
272 and used to discriminate between *M. abscessus* complex species (Chae *et al.*, 2017).  
273 Further analysis of the *mass\_3210* aligned sequences of representative isolates showed  
274 two clustered groups: MAB01-MAB05 and MAS01-MAS05 (Figure 4). This result  
275 implies that MAB01-MAB05 isolates clustered together, showing that they belonged  
276 to one subspecies (*M. abscessus*). On the other hand, MAS01-MAS05 isolates grouped  
277 together, showing that they belonged to *M. massiliense* subspecies.

278

#### 279 **Drug-resistance Profile of *Mycobacterium abscessus* complex**

280 Results of the antimicrobial susceptibility assay of the *M. abscessus* complex are shown  
281 in Table 2. The present study showed that amikacin was the most active agent against  
282 all *M. abscessus* and *M. massiliense* isolates with an MIC of <1µg/ml for both groups.  
283 These are in conformity with the results of the study of Nie *et al.* in 2014 which showed  
284 that the susceptibility rate of *M. abscessus* to AMK was 98%. Likewise, Park *et al.*  
285 (2008) reported a 99% susceptibility rate of *M. abscessus* to AMK, while Kim *et al.*  
286 (2015) reported the susceptibility rate of *M. abscessus* and *M. massiliense* to AMK as  
287 91.2% and 100%, respectively. The susceptibility of all isolates to amikacin in the  
288 present study may be attributed to the current treatment regimen for MDR-TB in the  
289 country which is comprised of kanamycin and not amikacin. Amikacin resistant  
290 isolates are not positively selected for to survive and thus are not disseminated.

291

292 On the other hand, FOX was shown to be less potent *in vitro* against *M. abscessus* and  
293 *M. massiliense* isolates compared to amikacin. Although there were no *M. abscessus*  
294 isolates that were resistant to the drug, and a low 10% of the *M. massiliense* were  
295 resistant to the agent, 63.6% of the *M. abscessus* and 50% of the *M. massiliense* isolates  
296 were only moderately susceptible to ceftazidime. The remaining 36.4% and 40% of the  
297 *M. abscessus* and *M. massiliense* isolates were susceptible to it. The results are  
298 comparable to those of Nie *et al.* (2014) that showed 0% resistant *M. abscessus* isolates,  
299 while 53% were moderately susceptible. Koh *et al.* (2010) likewise showed no resistant  
300 isolates of *M. abscessus* and only 1% resistance rate in *M. massiliense* against FOX.  
301 Lee *et al.* (2015) reported resistance rate of 1.3% in *M. abscessus* subsp. *massiliense*  
302 and 0% for *M. abscessus* subsp. *abscessus* against FOX.

303

304 Susceptibility rates of *M. abscessus* complex isolates in the present study showed that  
305 MXF has better *in vitro* activity against *M. abscessus* (81.8% susceptible) and *M.*  
306 *massiliense* (60% susceptible) compared to CIP against *M. abscessus* (9.1%  
307 susceptible) and *M. massiliense* (20% susceptible). This is consistent with other studies  
308 showing that MXF has better *in vitro* activity against *M. abscessus* and *M. massiliense*  
309 compared to CIP (Kim *et al.*, 2015; Lee *et al.*, 2014; Koh *et al.*, 2010). On the other  
310 hand, DOX was found to be more potent against *M. abscessus* (72.7% susceptible)  
311 isolates compared to its activity against *M. massiliense* (10% susceptible). The  
312 resistance rate of *M. massiliense* (60%) in the present study is compatible with the  
313 findings of Koh *et al.* (73%) and Lee *et al.* (73.4%).

314

315 Macrolides, specifically, AZM and CLR are the drugs of choice for the treatment of  
316 infections caused by the *M. abscessus* complex. The present study reported 100%  
317 susceptibility rate for both *M. abscessus* and *M. massiliense* isolates on the 3<sup>rd</sup> day of  
318 incubation. However, inducible resistance to both CLR and AZM were found in *M.*  
319 *abscessus* MAB04 with MICs of >16µg/ml for both drugs on the 7<sup>th</sup> day of incubation,  
320 while *M. abscessus* MAB07 showed inducible resistance to AZM with an MIC of  
321 16µg/ml on the 7<sup>th</sup> day, and inducible resistance to CLR on the 14<sup>th</sup> day (MIC  
322 16µg/ml). *Mycobacterium abscessus* isolate MAB09 showed inducible resistance to  
323 both CLR (>16µg/ml) and AZM (>16µg/ml) on the 14<sup>th</sup> day of incubation. Inducible  
324 resistance in *M. abscessus* was expected since they have a functional erm(41) gene  
325 (Kim *et al.*, 2015; Koh *et al.*, 2010; Nash *et al.*, 2009). On the other hand, three *M.*  
326 *massiliense* isolates (MAS04: >16µg/ml, MAS06: >16µg/ml, MAS10: >16µg/ml)  
327 exhibited inducible resistance to CLR and AZM on the 14<sup>th</sup> day. This is contrast with  
328 previous studies (Kim *et al.*, 2015; Koh *et al.*, 2010) which demonstrated that inducible  
329 resistance to CLR was only present in *M. abscessus* and not in *M. massiliense*.  
330 Nevertheless, our results support the findings of Li *et al.* (2017) and Shallom *et al.*  
331 (2013) showing that *M. massiliense* exhibited an inducible resistance to CLR. Lastly,  
332 the MIC of the test drugs for the susceptible reference *M. peregrinum* ATCC 700686  
333 used for quality control were all in accordance with the tentative quality control ranges  
334 for rapidly growing mycobacteria as indicated in the CLSI M24-A2 (2011) guidelines.  
335  
336 The resistance phenotypes of *M. abscessus* complex isolates are summarized in Table

337 3. Overall, 42.9% (9/21) of the *M. abscessus* complex isolates were found MDR; 14.3%  
338 of which were *M. abscessus* isolates and 28.6% of were *M. massiliense* isolates. MDR  
339 is defined as resistance to at least one agent in three or more antimicrobial categories  
340 (Magiorakos *et al.*, 2012).

341

342 Although the MDR percentage obtained in the study is lower than the 97.2% MDR  
343 report of Candido *et al.* (2104), where *M. abscessus* complex isolates were found to be  
344 resistant to five or more antimicrobial agents, the emergence of multidrug-resistant *M.*  
345 *abscessus* complex isolates in the country is of serious concern which impacts on the  
346 current treatment regimen given to patients with *M. abscessus* infection. This calls for  
347 the need to conduct antimicrobial susceptibility testing of clinical isolates of *M.*  
348 *abscessus* complex for better management of the patients, and for the prevention of the  
349 selection for resistant strains to survive and be disseminated.

350

### 351 **Molecular Characterization of Drug-resistance of *Mycobacterium abscessus*** 352 **complex**

353 In the present study, the *erm(41)* gene of all the *M. abscessus* and *M. massiliense*  
354 isolates with inducible resistance was amplified. All three *M. abscessus* isolates  
355 (MAB04, MAB07, MAB09) showing inducible resistance to CLR and AZM were  
356 found to have a full-length *erm(41)* gene of 892bp. These isolates with the full-length  
357 *erm(41)* gene have a T28 sequevar which is associated with inducible resistance to  
358 macrolides. Such resistance can affect the current treatment regimen of a patient, thus  
359 contributing to the hurdles towards successful treatment. Interestingly, all three *M.*



360 *massiliense* isolates (MAS04, MAS06, MAS10) with an MIC of >16ug/ml harbored a  
361 full-length *erm(41)* gene that is present only in *M. abscessus* (Nash *et al.*, 2009),  
362 instead of the expected truncated *erm(41)* gene. This finding supports the results of  
363 other studies (Lipworth *et al.*, 2018; Shallom *et al.*, 2013), which also reported the  
364 presence of a functional *erm(41)* gene in *M. massiliense* leading to a resistant  
365 phenotype. The mutation patterns of the macrolide-resistant *M. abscessus* complex  
366 isolates are summarized in Table 4. Caution should thus be practiced in using the  
367 *erm(41)* gene in identifying subspecies of *M. abscessus* complex.

368

369 Among the six macrolide-resistant isolates, MAB4 showed the most number of  
370 nucleotide substitutions in the *erm(41)* gene. MAB4 is also the only isolate that showed  
371 inducible resistance to both azithromycin and clarithromycin earliest on the 7<sup>th</sup> day.  
372 Such polymorphisms include nucleotide substitutions in positions A238G, C253A,  
373 A255T, and A312C, all of which lead to missense mutations. Additionally, all isolates  
374 harbored the T28 sequevar which is associated with inducible resistance to macrolides.  
375 Aside from harboring a thymine at position 28 (T28), the remaining isolates, except for  
376 MAB4 and MAB7, showed base substitution at position 168 (G168C). Nevertheless,  
377 this only resulted in silent mutation. In addition, base substitution at position 255  
378 (A255G) was found in all isolates, except for MAB4, which also resulted to a silent  
379 mutation, thus no observable effect on the organism's phenotype.

380

381 The 836 bp amplicons of the *rrl* gene of macrolide resistant isolates of *M. massiliense*  
382 did not show mutations in positions 2057, 2058 and 2059 which are commonly

383 associated with acquired resistance (Wallace *et al.*, 1996; Bastian *et al.*, 2011; Maurer  
384 *et al.*, 2014). Hence, the macrolide resistance shown in these isolates in the study can  
385 be attributed to its T28 sequevar in the *erm(41)* gene. There were three *M. abscessus*  
386 isolates that showed inducible resistance to macrolides which is attributed to the T28  
387 sequevar of the *erm(41)* gene.

388 Sequence analysis of the *gyrA* quinolone resistance-determining region (QRDR)  
389 revealed only one nucleotide substitution(T252C) present in *M. abscessus* complex  
390 isolates, while four nucleotide substitutions (T1443C, C1458T, C1479A, C1494T)  
391 were observed in the *gyrB* QRDR (Table 5). Nevertheless, all observed nucleotide  
392 substitutions in the *gyrA* and *gyrB* QRDR only caused silent mutations, which do not  
393 cause observable effect on the organism's phenotype. However, it was also observed  
394 that all fluoroquinolone resistant isolates of *M. abscessus* complex showed the presence  
395 of an alanine residue at position 83 (Ala-83) in the *gyrA* QRDR. The presence of Ala-  
396 83 is different from those reported in susceptible bacteria harboring a serine residue at  
397 position 83 (Ser-83) (Yoshida *et al.*, 1990). Moreover, all ciprofloxacin resistant  
398 isolates harbored an arginine residue at position 447 (Arg-447), and an asparagine  
399 residue at position 464 (Asn-464) in the *gyrB* QRDR. These amino acid substitutions  
400 are different from those found in susceptible bacteria harboring a lysine at position 447  
401 (Lys-447) and a serine at position 464 (Ser-464\_ (Yoshida *et al.*, 1991). These results  
402 are in accordance with other studies (Esfahani *et al.*, 2016; de Moura *et al.*, 2012;  
403 Guillemin *et al.*, 1998; Guillemin *et al.*, 1995;), showing that substitutions of amino  
404 acids at these positions are associated with acquired resistance to fluoroquinolones. It  
405 is hypothesized that the presence of these amino acids could decrease the interaction

406 between the quinolone drug and the gyrase A and B subunit-DNA complex (Guillemin  
407 *et al.*, 1998).

408

409 To our knowledge, this is the first study to assess the drug resistance profile including  
410 determination of the genetic mechanisms of drug resistance of *M. abscessus* complex  
411 in the Philippines. Therefore, the findings of this study presented a potential area of  
412 interest about nontuberculous mycobacteria (NTM) that need to be explored.

413

414 Based on the findings of the study, correct identification of *M. abscessus* complex  
415 subspecies is important because their responses to anti-TB medications vary from one  
416 subspecies to another. Isolation and identification of NTM species, which are not parts  
417 of the routine procedure in most clinical microbiology laboratory in the Philippines is  
418 important to understand the issues on NTM in clinical samples.

419

420

#### 421 **ACKNOWLEDGMENTS**

422 This research was supported by a grant from the Department of Science and  
423 Technology through the Accelerated Science and Technology Human Resource  
424 Development Program – National Science Consortium (ASTHRDP-NSC).

425

426 **REFERENCES**

- 427 **1.** Al-Mutairi NM, Ahmad S, Mokkaas E. 2011. Performance comparison of  
428 Four methods for detecting multidrug-resistant *Mycobacterium tuberculosis*  
429 strains. *International Journal of Tuberculosis and Lung Diseases* 7(2):66-69.
- 430 **2.** Bastian S, Veziris N, Roux AL. 2011. Assessment of clarithromycin  
431 susceptibility in strains belonging to the *Mycobacterium abscessus* group by  
432 *erm*(41) and *rrl* sequencing. *Antimicrobial Agents Chemotherapy* 55: 775– 781.
- 433 **3.** Byrd TF & Lyons CR. 1999. Preliminary characterization of a *Mycobacterium*  
434 *abscessus* mutant in human and murine models of infection. *Infection and*  
435 *Immunity* 67(9): 4700-4707.
- 436 **4.** Candido PHC, Nunes LDS, Marques EA, Folescu TW, Coelho FS, de Moura  
437 VCN, da Silva MG, Gomes KM, da Silva Lourenco MC, Aguiar FS, Chitolina  
438 F, Armstrong DT, Leao SC, Neves FPG, de Quieroz Mello FC, Duarte RS.  
439 2014. Multidrug-Resistant Nontuberculous Mycobacteria Isolated from Cystic  
440 Fibrosis Patients. *Journal of Clinical Microbiology* 52(8): 2990-2997.
- 441 **5.** Chae H, Han SJ, Kim SY, Ki CS, Huh HJ, Yong D, Koh WJ, Shin SJ. 2017.  
442 Development of a one-step multiplex PCR assay for differential detection of  
443 Major *Mycobacterium* species. *Journal of Clinical Microbiology*.  
444 doi:10.1128/JCM.00549-17.
- 445 **6.** Charan J, Biswas T. 2013. How to calculate sample size for different study  
446 designs in medical research? *Indian Journal of Psychological Medicine* 35(2):  
447 121-126.
- 448 **7.** Clinical and Laboratory Standards Institute 2011. Susceptibility Testing of

- 449           Mycobacteria, Nocardiae, and other Aerobic Actinomycetes, approved  
450           standard, 2nd ed. CLSI document M24-A2. Wayne, PA: Clinical Laboratory  
451           and Standards Institute.
- 452   **8.**   de Moura VCN, de Silva MG, Gomes KM, Coelho FS, Sampaio JLM, Mello  
453           FCQ, Lourenco MCS, Amorim ELT, Duarte RS. 2012. Phenotypic and  
454           Molecular Characterization of Quinolone Resistance in *Mycobacterium*  
455           *abscessus* subsp. *bolletii* recovered from Postsurgical Infections. Journal of  
456           Medical Microbiology 61: 115-125.
- 457   **9.**   Esfahani BN, Esfahani FSZ, Bahador M, Moghim S, Radaei T, Yazdi HR, Safaei  
458           HG, Fazeli H. 2016. Analysis of DNA *gyrA* Gene Mutation in Clinical and  
459           Environmental Ciprofloxacin-Resistant Isolates of Non-Tuberculous  
460           Mycobacteria Using Molecular Methods. Jundishapur Journal of Microbiology  
461           9(3):e30018.
- 462   **6.**   Franzblau SG, Witzig RS, McLaughlin JC, Torres P, Madico G, Hernandez A,  
463           Degnan MT, Cook MB, Quenzer VK, Ferguson RM, Gilman RH. 1998. Rapid,  
464           Low-Technology MIC Determination with Clinical *Mycobacterium*  
465           *tuberculosis* Isolates by Using the Microplate Alamar Blue Assay. Journal of  
466           Clinical Microbiology 36(2): 362-366.
- 467   **7.**   Gler MT, Macalintal LE, Raymond LO, Guilatco R, Quelapio MI, Tupasi  
468           TE. 2012. Multidrug-Resistant Tuberculosis among Previously Treated  
469           Patients in the Philippines. International Journal of TB and Lung Disease 15:5.
- 470   **8.**   Guillemin I, Jarlier V, Cambau E. 1998. Correlation between quinolone  
471           susceptibility patterns and sequences in the A and B subunits of DNA gyrase in

- 472 mycobacteria. *Antimicrobial Agents and Chemotherapy* 39:2145-2149.
- 473 **9.** Guillemin I, Cambau E, Jarlier V. 1995. Sequences of conserved region in the  
474 A subunit of DNA gyrase from nine species of the genus *Mycobacterium*:  
475 phylogenetic analysis and implication for intrinsic susceptibility to quinolones.  
476 *Antimicrobial Agents Chemotherapy* 39: 2145-2149.
- 477 **10.** Howard ST, Rhoades E, Recht J, Pang X, Alsup A, Kolter R, Lyons CR, Byrd  
478 TF. 2006. Spontaneous reversion of *Mycobacterium abscessus* from a smooth  
479 to a rough morphotype is associated with reduced expression of  
480 glycopeptidolipid and reacquisition of an invasive phenotype. *Microbiology*  
481 152(6):1581-90.
- 482 **11.** Kim SY, Kim CK, Bae IK, Jeong SH, Yim JJ, Jung JY, Park MS, Kim YS, Kim  
483 SK, Chang J, Kang YA. 2015. The drug susceptibility profile and inducible  
484 resistance to macrolides of *Mycobacterium abscessus* and *Mycobacterium*  
485 *massiliense* in Korea. *Diagnostic Microbiology and Infectious Disease* 81:107-  
486 111.
- 487 **12.** Koh WJ, Jeon K, Lee NY, Kim BJ, Kook YH, Lee SH, Park YK, Kim CK, Shin  
488 SJ, Huitt GA, Daley CL, Kwon OJ. 2010. *American Journal of Respiratory and*  
489 *Critical Care Medicine*. 183(3).
- 490 **13.** Lee MR, Sheng WH, Hung CC, Yu CJ, Lee LN, Hsueh PR. 2015.  
491 *Mycobacterium abscessus* complex infections in human. *Emerging Infectious*  
492 *Diseases* 21(9):1638-1646.
- 493 **14.** Lee SH, Yoo HK, Kim SH, Koh WJ, Kim CK, Park YK, Kim HJ. 2014. The  
494 drug resistance profile of *Mycobacterium abscessus* group strains in Korea.

- 495           Annals of Laboratory Medicine 34(1): 31-37.
- 496   **15.**   Li B, Yang S, Chu H, Zhang Z, Liu W, Luo W, Ma W, Xu X. 2017.
- 497           Relationship between Antibiotic Susceptibility and Genotype in *Mycobacterium*
- 498           *abscessus* Clinical Isolates. *Frontiers in Microbiology* 8: 1739.
- 499   **16.**   Lipworth S, Hough N, Leach L, Morgan M, Jeffrey K, Andersson M, Robinson
- 500           E, Smith EG, Crook D, Peto T, Walker T. 2018. Whole-Genome Sequencing for
- 501           Predicting Clarithromycin Resistance in *Mycobacterium abscessus*.
- 502           Antimicrobial Agents Chemotherapy. doi: 10.1128/AAC.01204-18.
- 503   **17.**   Magiorakos AP, Srinivasan A, Carey RB, Carmeli Y, Falagas ME, Giske CG,
- 504           Harbarth S, Hindler JF, Kahlmeter G, Olsson-Liljequist B, Paterson DL, Rice
- 505           LB, Stelling J, Struelens MJ, Vatopoulos A, Weber JT, Monnet DL. 2012.
- 506           Multidrug- resistant, extensively drug-resistant and pandrug-resistant bacteria:
- 507           an international expert proposal for interim standard definitions for acquired
- 508           resistance. *Clinical Microbiology and Infection* 18: 268-281.
- 509   **18.**   Maurer FP, Castelberg C, Quiblier C, Böttger EC, Somoskóvi A. 2014.
- 510           *Erm(41)*- dependent inducible resistance to azithromycin and clarithromycin in
- 511           clinical isolates of *Mycobacterium abscessus*. *Journal of Antimicrobial*
- 512           Chemotherapy, 69: p.1559–1563.
- 513   **19.**   Nash KA, Brown-Elliott BA, Wallace RJ Jr. 2009. A novel gene, *erm(41)*,
- 514           Confers inducible macrolide resistance to clinical isolates of *Mycobacterium*
- 515           *abscessus* but is absent from *Mycobacterium chelonae*. *Antimicrobial Agents*
- 516           Chemotherapy 53:1367-1376.
- 517   **20.**   Nash KA, Inderlied CB. 1995. Genetic basis of macrolide resistance in

- 518 *Mycobacterium avium* isolated from patients with disseminated disease.  
519 Antimicrobial Agents and Chemotherapy 39:2635-30.
- 520 **21.** Nie W, Duan H, Huang H, Lu Y, Bi P, Chu N. 2014. Species identification of  
521 *Mycobacterium abscessus* subsp. *abscessus* and *Mycobacterium abscessus*  
522 subsp. *bolletii* using *rpoB* and *hsp65*, and susceptibility testing to eight  
523 Antibiotics. International Journal of Infectious Diseases 25: 170-174.
- 524 **22.** Park S, Kim S, Park EM, Kim H, Kwon OJ, Chang CL, Lew WJ, Park YK, &  
525 Koh WJ 2008. *In vitro* antimicrobial susceptibility of *Mycobacterium*  
526 *abscessus* in Korea. Journal of Korean Medical Science 23: 49 – 52.
- 527 **23.** Prammananan T, Sander P, Brown BA, Frischkorn K, Onyi GO, Zhang Y,  
528 Böttger EC, Wallace RJ Jr. 1998. A single 16S ribosomal RNA substitution  
529 is responsible for resistance to amikacin and other 2-deoxystreptamine  
530 aminoglycosides in *Mycobacterium abscessus* and *Mycobacterium chelonae*.  
531 Journal of Infectious Diseases 177:1573-81.
- 532 **24.** Pourhoseingholi MA, Vahedi M, Rahimzadeh M. 2013. Sample size  
533 calculation in medical studies. Gastroenterology and Hepatology from Bed to  
534 Bench 6(1):14-17.
- 535 **25.** Shallom SJ, Gardina PJ, Myers TG, Sebastian Y, Conville P, Calhoun LB,  
536 Tettelin H, Olivier KN, Uzel G, Sampaio EP, Holland SM, Zelazny AM. 2013.  
537 New Rapid Scheme for Distinguishing the Subspecies of the *Mycobacterium*  
538 *abscessus* Group and Identifying *Mycobacterium massiliense* Isolates with  
539 Inducible Clarithromycin Resistance. Journal of Clinical Microbiology 51:  
540 2943-2949.



- 541   **26.** Siapno RP, King Kay CB, Visperas JC. 2016. The Incidence of Mycobacterium  
542           Other than Tuberculosis Isolated in Specimens Suspected of Tuberculosis in a  
543           Tertiary Hospital in the Philippines: A Retrospective Study. *Philippine Journal*  
544           of Internal Medicine (54):4
- 545   **27.** Sowajassatakul A, Prammananan T, Cahiprasert A, Phunpruch S. 2014. Molecular  
546           characterization of amikacin, kanamycin, and capreomycin resistance in M/XDR-  
547           TB strain isolates in Thailand.
- 548   **28.** Wallace RJ, Meier A, Brown BA. 1996. Genetic basis for clarithromycin resistance  
549           among isolates of *Mycobacterium chelonae* and *Mycobacterium abscessus*.  
550           Antimicrobial Agents Chemotherapy 40: p.1676–1681.
- 551   **29.** Yoshida Y, Bogaki M, Nakamura M, Yamanaka LM, Nakamura S. 1991.  
552           Quinolone Resistance-Determining Region in the DNA Gyrase *gyrB* Gene of  
553           *Escherichia coli*. Antimicrobial Agents and Chemotherapy 35: 1647-1650
- 554   **30.** Yoshida Y, Bogaki M, Nakamura M, Nakamura S. 1990. Quinolone Resistance-  
555           Determining Region in the DNA Gyrase *gyrA* Gene of *Escherichia coli*.  
556           Antimicrobial Agents and Chemotherapy 34: 1271-1272.  
557

558 **Figure Legends**

559 **Figure 1.** Biofilm formation of *M. abscessus* complex in 7H9 medium (A). Colony  
560 morphology of *M. abscessus* complex isolates showing two morphotypes: rough and  
561 smooth colonies (B). All isolates are nonphotochromogens (non-pigmented).

562

563 **Figure 2.** Positive AFB smear result under 1000x magnification, with immersion oil.

564

565 **Figure 3.** One-step Multiplex PCR Assay results using primers for *mass\_3210* gene.

566 Molecular marker (100 plus bp); Ctrl MAB: *M. abscessus* control (310bp *mass\_3210*  
567 amplicon) and the *Mycobacterium*-specific 16S rRNA internal control (506bp); Ctrl  
568 MAS: *M. massiliense* control (1145bp *mass\_3210* amplicon) and the *Mycobacterium*  
569 specific 16S rRNA internal control (506bp). MAS = *M. massiliense*; MAB = *M.*

570 *abscessus*.

571

572 **Figure 4.** Neighbor-joining tree based on *mass\_3210* sequences. Dendrogram showing  
573 the clustering of *M. abscessus* isolates (MAB01-MAB05) and *M. massiliense* isolates  
574 (MAS01-MAS05) together with *mass\_3210*. The *IS\_1311* sequence which is specific  
575 to *M. avium* complex (MAC) was used as the outgroup.

576

577 **Table 1.** Phenotypic characteristics of *M. abscessus* and *M. massiliense* isolates from patients with MDR TB infections.

| <b>Study ID</b> | <b>AFB Smear</b> | <b>Growth Rate</b> | <b>Pigmentation</b> | <b>Colony Morphology</b> |
|-----------------|------------------|--------------------|---------------------|--------------------------|
| MAB01           | +                | Day 3              | buff                | smooth                   |
| MAB02           | +                | Day 3              | buff                | rough                    |
| MAB03           | +                | Day 3              | buff                | rough                    |
| MAB04           | +                | Day 3              | buff                | smooth                   |
| MAB05           | +                | Day 3              | buff                | smooth                   |
| MAB06           | +                | Day 3              | buff                | smooth                   |
| MAB07           | +                | Day 3              | buff                | rough                    |
| MAB08           | +                | Day 3              | buff                | rough                    |
| MAB09           | +                | Day 3              | buff                | smooth                   |
| MAB10           | +                | Day 3              | buff                | smooth                   |
| MAB11           | +                | Day 3              | buff                | smooth                   |
| MAS01           | +                | Day 3              | buff                | rough                    |
| MAS02           | +                | Day 3              | buff                | rough                    |
| MAS03           | +                | Day 3              | buff                | rough                    |
| MAS04           | +                | Day 3              | buff                | rough                    |
| MAS05           | +                | Day 3              | buff                | smooth                   |
| MAS06           | +                | Day 3              | buff                | smooth                   |
| MAS07           | +                | Day 3              | buff                | rough                    |
| MAS08           | +                | Day 3              | buff                | smooth                   |
| MAS09           | +                | Day 3              | buff                | rough                    |
| MAS10           | +                | Day 3              | buff                | rough                    |

584 MAB = *M. abscessus*; MAS = *M. massiliense*

585 **Table 2.** Antimicrobial susceptibility test results of *M. abscessus* and *M. massiliense*  
 586 using broth microdilution method against seven (7) antimicrobial drugs.

| Antimicrobial Drugs | <i>M. abscessus</i> subspecies (n) | Results read on | MIC range (ug/ml) | Susceptible No. (%) | Moderately Susceptible No. (%) | Resistant No. (%) |
|---------------------|------------------------------------|-----------------|-------------------|---------------------|--------------------------------|-------------------|
| Amikacin            | <i>M. abscessus</i> (n=11)         | Day 3           | <1                | 11 (100%)           | 0                              | 0                 |
|                     | <i>M. massiliense</i> (n=10)       |                 | <1                | 10 (100%)           | 0                              | 0                 |
| Cefoxitin           | <i>M. abscessus</i> (n=11)         | Day 3           | 4-64              | 4 (36.4%)           | 7 (63.6%)                      | 0                 |
|                     | <i>M. massiliense</i> (n=10)       |                 | 16-128            | 4 (40.0%)           | 5 (50.0%)                      | 1 (10.0%)         |
| Ciprofloxacin       | <i>M. abscessus</i> (n=11)         | Day 3           | 0.125-8           | 1 (9.1%)            | 4 (36.4%)                      | 6 (54.5%)         |
|                     | <i>M. massiliense</i> (n=10)       |                 | 0.25-16           | 2 (20.0%)           | 6 (60.0%)                      | 2 (20.0%)         |
| Moxifloxacin        | <i>M. abscessus</i> (n=11)         | Day 3           | 0.125-2           | 9 (81.8%)           | 2 (18.2%)                      | 0                 |
|                     | <i>M. massiliense</i> (n=10)       |                 | 0.5-16            | 6 (60.0%)           | 3 (30.0%)                      | 1 (10.0%)         |
| Doxycycline         | <i>M. abscessus</i> (n=11)         | Day 3           | 0.25-32           | 8 (72.7%)           | 1 (9.1%)                       | 2 (18.2%)         |
|                     | <i>M. massiliense</i> (n=10)       |                 | 0.125-16          | 1 (10.0%)           | 3 (30.0%)                      | 6 (60.0%)         |
| Azithromycin        | <i>M. abscessus</i> (n=11)         | Day 3           | <0.06-1           | 11 (100%)           | 0                              | 0                 |
|                     |                                    | Day 7           | 0.125->16         | 9 (81.8%)           | 0                              | 2 (18.2%)         |
|                     |                                    | Day 14          | 0.25->16          | 7 (63.6%)           | 1 (9.1%)                       | 3 (27.3%)         |
|                     | <i>M. massiliense</i> (n=10)       | Day 3           | <0.06-1           | 10 (100%)           | 0                              | 0                 |
|                     |                                    | Day 7           | 0.125-1           | 10 (100%)           | 0                              | 0                 |
|                     |                                    | Day 14          | 0.125->16         | 7 (70%)             | 0                              | 3 (30%)           |
| Clarithromycin      | <i>M. abscessus</i> (n=11)         | Day 3           | <0.06-0.5         | 11 (100%)           | 0                              | 0                 |
|                     |                                    | Day 7           | <0.06->16         | 9 (81.8%)           | 1 (9.1%)                       | 1 (9.1%)          |
|                     |                                    | Day 14          | <0.06->16         | 7 (63.6%)           | 1 (9.1%)                       | 3 (27.3%)         |
|                     | <i>M. massiliense</i> (n=10)       | Day 3           | <0.06-2           | 10 (100%)           | 0                              | 0                 |
|                     |                                    | Day 7           | <0.06-2           | 10 (100%)           | 0                              | 0                 |
|                     |                                    | Day 14          | 0.25->16          | 7 (70%)             | 0                              | 3 (30%)           |

587 <sup>a</sup> extended incubation up to 14 days to determine inducible resistance to macrolides

588 **Table 3.** Resistance phenotypes of *M. abscessus* and *M. massiliense* in the study

| Study ID | Subspecies Identification | Antimicrobial Agents |     |     |     |     |     |     | MDR* |
|----------|---------------------------|----------------------|-----|-----|-----|-----|-----|-----|------|
|          |                           | AZM                  | CLR | AMK | FOX | CIP | MXF | DOX |      |
| MAB01    | <i>M. abscessus</i>       | S                    | S   | S   | M   | R   | S   | M   | +    |
| MAB02    | <i>M. abscessus</i>       | S                    | S   | S   | M   | M   | S   | S   | -    |
| MAB03    | <i>M. abscessus</i>       | S                    | S   | S   | M   | S   | S   | S   | -    |
| MAB04    | <i>M. abscessus</i>       | IR                   | IR  | S   | M   | S   | S   | S   | -    |
| MAB05    | <i>M. abscessus</i>       | S                    | S   | S   | M   | R   | S   | S   | -    |
| MAB06    | <i>M. abscessus</i>       | S                    | S   | S   | M   | R   | S   | S   | -    |
| MAB07    | <i>M. abscessus</i>       | IR                   | IR  | S   | S   | M   | S   | S   | -    |
| MAB08    | <i>M. abscessus</i>       | S                    | S   | S   | S   | R   | S   | S   | -    |
| MAB09    | <i>M. abscessus</i>       | IR                   | IR  | S   | M   | R   | M   | R   | +    |
| MAB10    | <i>M. abscessus</i>       | S                    | S   | S   | M   | R   | S   | S   | -    |
| MAB11    | <i>M. abscessus</i>       | S                    | S   | S   | M   | M   | M   | R   | +    |
| MAS01    | <i>M. massiliense</i>     | S                    | S   | S   | S   | M   | S   | M   | -    |
| MAS02    | <i>M. massiliense</i>     | S                    | S   | S   | M   | S   | S   | M   | -    |
| MAS03    | <i>M. massiliense</i>     | S                    | S   | S   | S   | S   | M   | R   | -    |
| MAS04    | <i>M. massiliense</i>     | IR                   | IR  | S   | M   | S   | S   | M   | +    |
| MAS05    | <i>M. massiliense</i>     | S                    | S   | S   | M   | S   | M   | R   | +    |
| MAS06    | <i>M. massiliense</i>     | IR                   | IR  | S   | R   | R   | M   | R   | +    |
| MAS07    | <i>M. massiliense</i>     | S                    | S   | S   | M   | M   | M   | S   | -    |
| MAS08    | <i>M. massiliense</i>     | S                    | S   | S   | M   | R   | R   | R   | +    |
| MAS09    | <i>M. massiliense</i>     | S                    | S   | S   | M   | M   | S   | R   | +    |
| MAS10    | <i>M. massiliense</i>     | IR                   | IR  | S   | M   | M   | S   | R   | +    |

589 Antimicrobial agents tested AZM (Azithromycin), CLR (Clarithromycin), AMK (Amikacin), FOX  
590 (Cefoxitin), CIP (Ciprofloxacin), MXF (Moxifloxacin), DOX (Doxycycline). The letter S is for susceptible,  
591 M indicates moderate susceptible, R is for resistant, and IR stands for inducible resistant isolate. The  
592 hyphen indicates that the isolate is not MDR while the (+) sign indicates that the isolate is MDR. Multidrug-  
593 resistant (MDR) is defined as resistance to at least one agent in three or more antimicrobial categories  
594 (Magiorakos *et al.*, 2012).

595 **Table 4.** Single nucleotide polymorphisms (SNPs) in the *erm*(41) gene associated with  
 596 macrolide-resistant isolates of *M. abscessus* and *M. massiliense*

| Study ID     | <u>T28</u><br><u>TGG</u><br>(Trp) | <u>T159</u><br><u>GGT</u><br>(Gly) | <u>G168</u><br><u>GTG</u><br>(Val) | <u>T231</u><br><u>GAT</u><br>(Asp) | <u>A238</u><br><u>ATA</u><br>(Ile) | <u>G249</u><br><u>GCG</u><br>(Ala) | <u>C253</u><br><u>CTA</u><br>(Leu) | <u>A255</u><br><u>CTA</u><br>(Leu) | <u>A312</u><br><u>CAA</u><br>(Glu) | <u>A330</u><br><u>ATA</u><br>(Ile) | <u>T336</u><br><u>AGT</u><br>(Ser) | <u>A414</u><br><u>CGA</u><br>(Arg) |
|--------------|-----------------------------------|------------------------------------|------------------------------------|------------------------------------|------------------------------------|------------------------------------|------------------------------------|------------------------------------|------------------------------------|------------------------------------|------------------------------------|------------------------------------|
| <b>MAB4</b>  | -                                 | C                                  | -                                  | C                                  | <u>G</u><br>(Val)                  | A                                  | A (Ile)                            | T (Ile)                            | <u>C</u><br>(His)                  | C                                  | C                                  | G                                  |
| <b>MAS4</b>  | -                                 | -                                  | C                                  | -                                  | -                                  | -                                  | -                                  | G                                  | -                                  | -                                  | -                                  | -                                  |
| <b>MAB7</b>  | -                                 | -                                  | -                                  | -                                  | -                                  | -                                  | -                                  | G                                  | -                                  | -                                  | -                                  | -                                  |
| <b>MAB9</b>  | -                                 | -                                  | C                                  | -                                  | -                                  | -                                  | -                                  | G                                  | -                                  | -                                  | -                                  | -                                  |
| <b>MAS6</b>  | -                                 | -                                  | C                                  | -                                  | -                                  | -                                  | -                                  | G                                  | -                                  | -                                  | -                                  | -                                  |
| <b>MAS10</b> | -                                 | -                                  | C                                  | -                                  | -                                  | -                                  | -                                  | G                                  | -                                  | -                                  | -                                  | -                                  |

597 MAB = *M. abscessus*; MAS = *M. massiliense*. The base substitution site is underlined for each codon  
 598 sequence. The hyphen indicates that the base is the same in the type strain sequence *Mycobacterium*  
 599 *abscessus* ATCC 19977. The type strain *M. abscessus* is intrinsically susceptible but has inducible  
 600 resistance to macrolides. T28 is associated with inducible-macrolide resistance. Bases of DNA:  
 601 Adenine (A), Guanine (G), Cytosine (C), and Thymine (T).

602 **Table 5.** Single nucleotide polymorphisms (SNPs) observed in the quinolone resistance-  
 603 determining region of *gyrA* and *gyrB* of  
 604 fluoroquinolone-resistant isolates of *M. abscessus* and *M. massiliense*

| Study ID | <i>gyrA</i> gene                   | <i>gyrB</i> gene                    |                                     |                                     |                                     |
|----------|------------------------------------|-------------------------------------|-------------------------------------|-------------------------------------|-------------------------------------|
|          | <b>T252</b><br><u>TAT</u><br>(Tyr) | <b>T1443</b><br><u>GGT</u><br>(Gly) | <b>T1458</b><br><u>TTC</u><br>(Phe) | <b>C1479</b><br><u>CGC</u><br>(Arg) | <b>C1494</b><br><u>AAC</u><br>(Asn) |
| MAB1     | C                                  | C                                   | T                                   | -                                   | -                                   |
| MAB5     | C                                  | C                                   | T                                   | A                                   | -                                   |
| MAB6     | C                                  | C                                   | T                                   | -                                   | -                                   |
| MAB8     | C                                  | C                                   | T                                   | -                                   | -                                   |
| MAB9     | -                                  | -                                   | -                                   | -                                   | T                                   |
| MAS6     | -                                  | -                                   | -                                   | -                                   | T                                   |
| MAB10    | C                                  | C                                   | T                                   | -                                   | -                                   |
| MAS8     | C                                  | C                                   | T                                   | -                                   | -                                   |

604 MAB = *M. abscessus*; MAS = *M. massiliense*. The base substitution site is underlined for each codon  
 605 sequence. The hyphen indicates that the base is the same in the type strain sequence *Mycobacterium*  
 606 *abscessus* ATCC 19977. Bases of DNA: Adenine (A), Guanine (G), Cytosine (C), and Thymine (T).

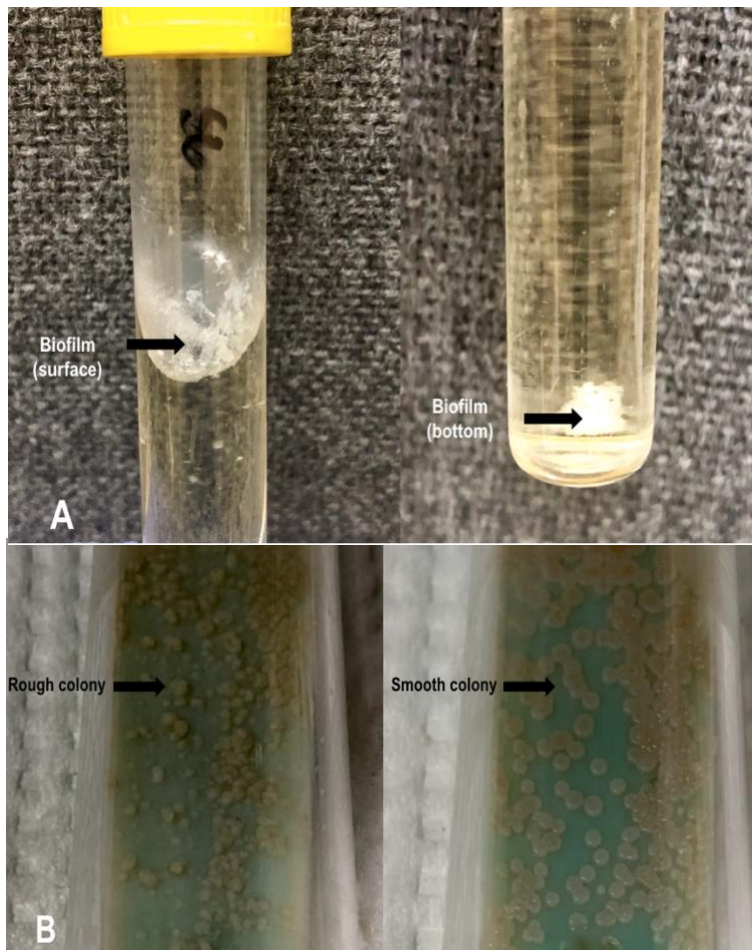

607 **Figure 1.** Biofilm formation of *M. abscessus* complex in 7H9 medium (A). Colony  
608 morphology of *M. abscessus* complex isolates showing two morphotypes: rough and  
609 smooth colonies (B). All isolates are nonphotochromogens (non-pigmented).



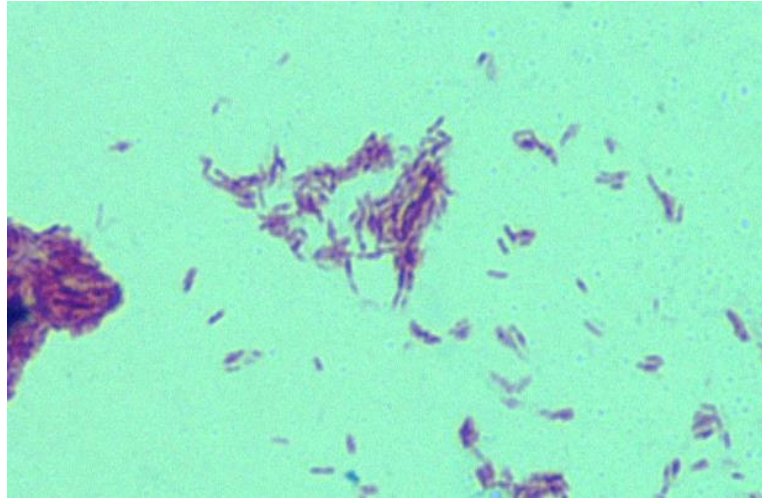

610 **Figure 2.** Positive AFB smear result under 1000x magnification.

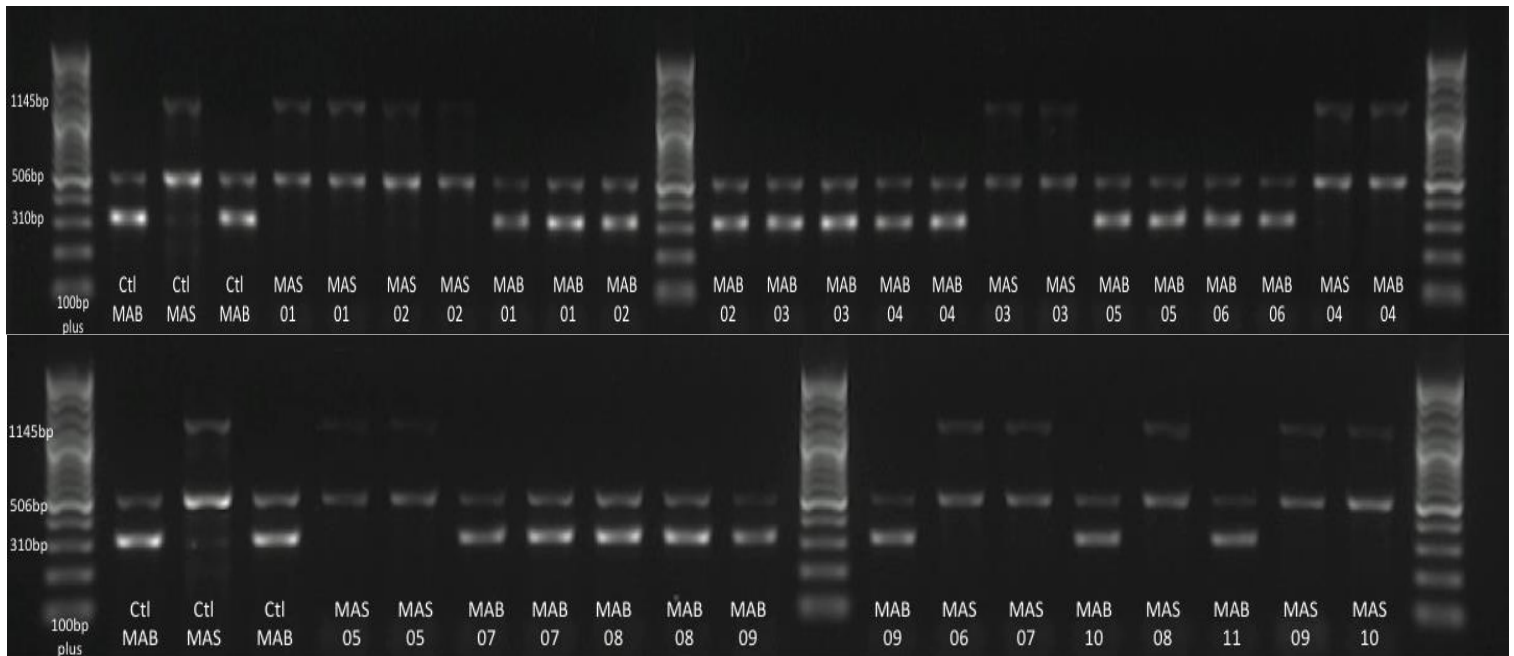

611 **Figure 3.** One-step Multiplex PCR Assay results using primers for *mass\_3210* gene.  
612 Molecular marker (100 plus bp); Ctl MAB: *M. abscessus* control (310bp *mass\_3210*  
613 amplicon) and the *Mycobacterium*-specific 16S rRNA internal control (506bp); Ctl  
614 MAS: *M. massiliense* control (1145bp *mass\_3210* amplicon) and the *Mycobacterium*-  
615 specific 16S rRNA internal control (506bp). MAS = *M. massiliense*; MAB = *M.*  
616 *abscessus*.

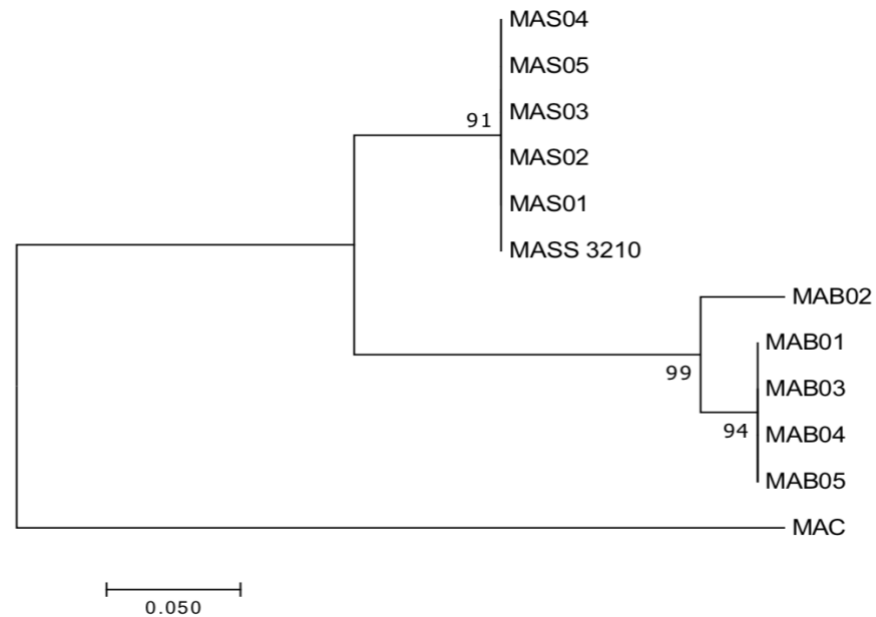

617 **Figure 4.** Neighbor-joining tree based on *mass\_3210* sequences. Dendrogram showing  
618 the clustering of *M. abscessus* isolates (MAB01-MAB05) and *M. massiliense* isolates  
619 (MAS01-MAS05) together with *mass\_3210*. The *IS\_1311* sequence which is specific  
620 to *M. avium* complex (MAC) was used as the outgroup.
